# Supplementary material
Source: Springer Nature journal article supplement (https://www.springermedizin.de/resource/supplementary/12992_2011_126_MOESM3_ESM.pdf/9616510)

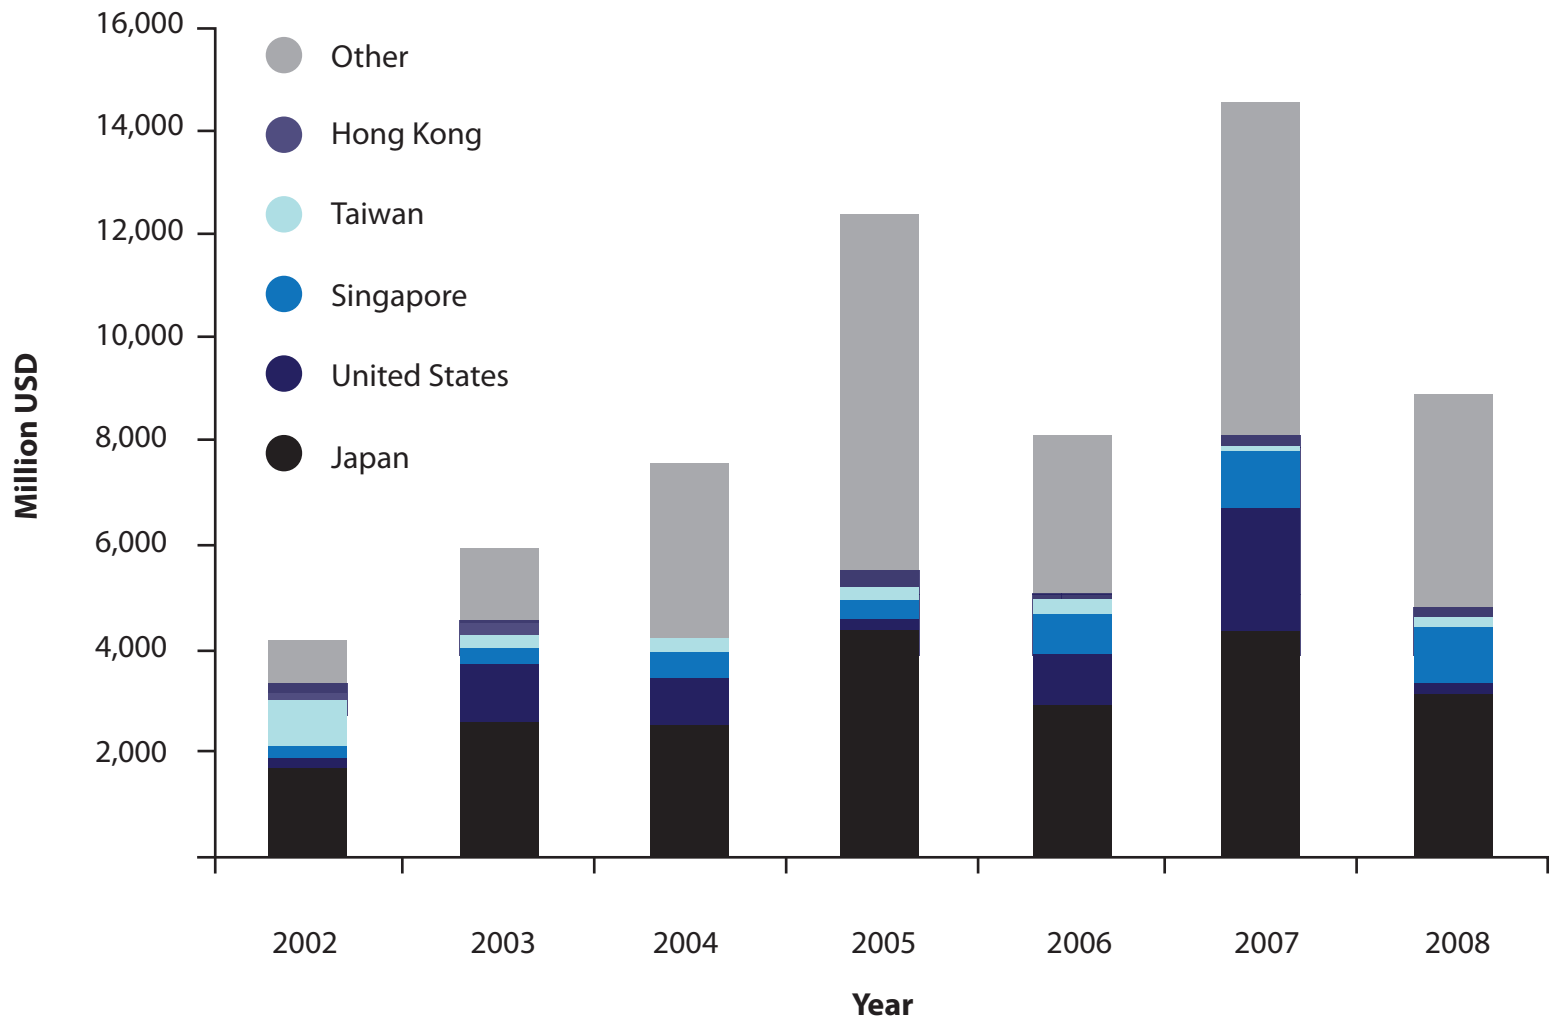

Source: Board of Investment of Thailand

Supplement: MOESM3 [file 9616510]
